# Supplementary material for: Targeting mitochondrial RNAs enhances the efficacy of the DNA-demethylating agents
Source: PubMed Central journal article supplement — Sci Rep. 2024 Dec 28;14:30767. doi: 10.1038/s41598-024-80834-z (PMC11680805; doi:10.1038/s41598-024-80834-z), 2024-12-28
Supplement: 41598_2024_80834_MOESM1_ESM.pdf [file 41598_2024_80834_MOESM1_ESM.pdf]

Supplementary Materials for

**Targeting mitochondrial RNAs enhances the efficacy of the DNA-demethylating agents**

Stephanie Tan,<sup>1</sup> Sujin Kim,<sup>1</sup> Yoosik Kim<sup>1,2,3,4</sup>

<sup>1</sup>Department of Chemical and Biomolecular Engineering, Korea Advanced Institute of Science and Technology (KAIST), Daejeon, 34141, Korea

<sup>2</sup>Graduate School of Engineering Biology, KAIST, Daejeon, 34141, Korea

<sup>3</sup>KAIST Institute for BioCentury, KAIST, Daejeon, 34141, Korea

<sup>4</sup>KAIST Institute for Health Science and Technology (KIHST), KAIST, Daejeon, 34141, Korea

\*Correspondence: [ysyoosik@kaist.ac.kr](mailto:ysyoosik@kaist.ac.kr)

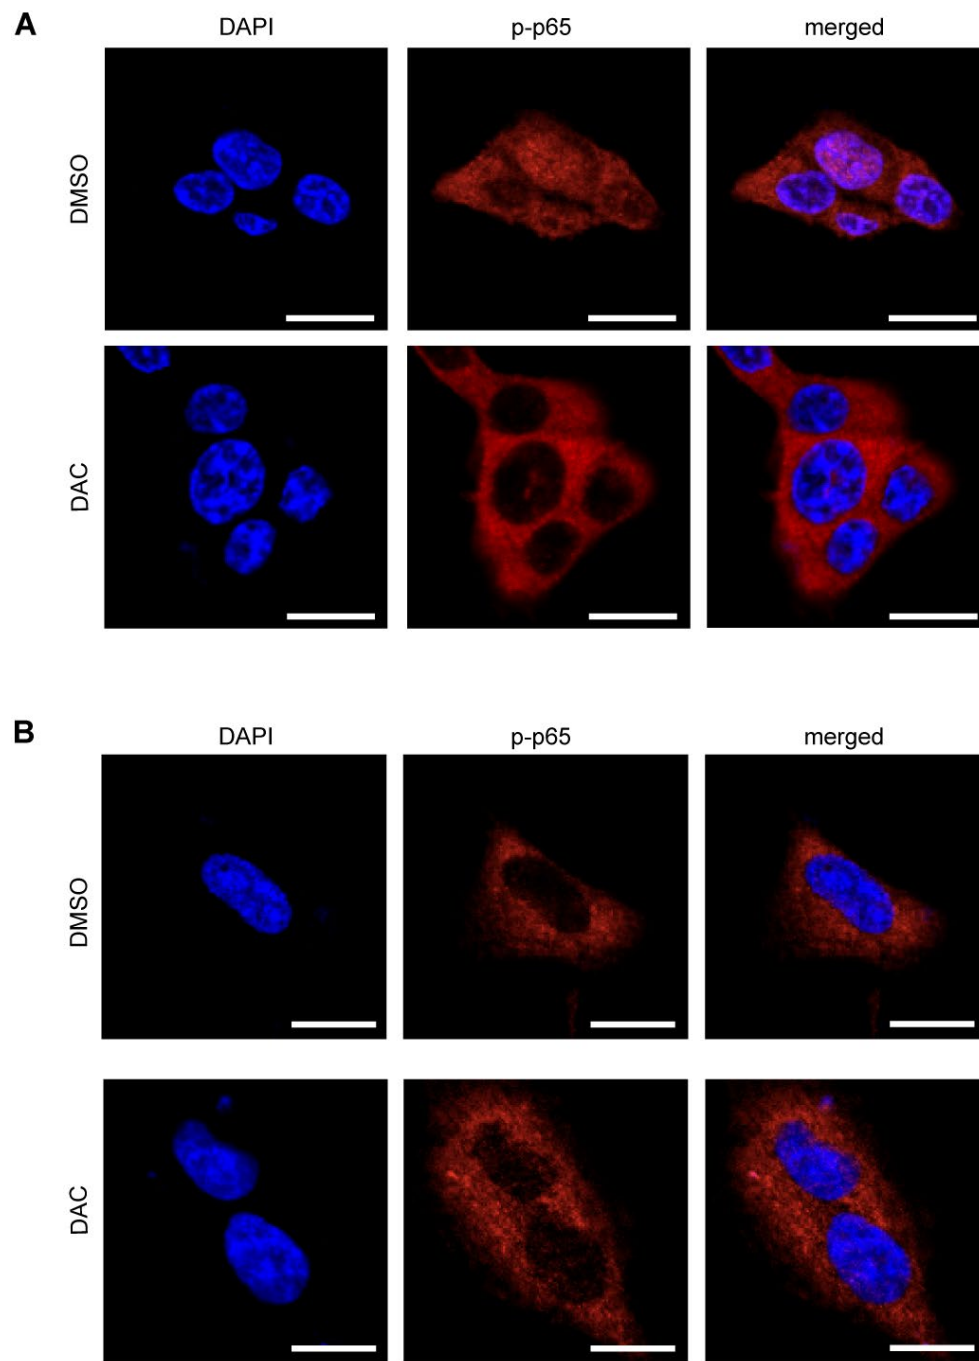

**Supplementary Figure S1. Subcellular localization of p-p65 upon DAC treatment.** (A, B) Nuclear localization of p-p65 in DMSO and DAC-treated HCT116 (A) and A549 cells (B) analyzed via immunocytochemistry with p-p65 antibody. DAPI was used to counterstain the nuclei. Scale bar indicates 20  $\mu$ m.

**Supplementary Table S1.** Sequences of sgRNAs

| Gene                  | Target sequence #1 (5'-3')                                                                                           | Target sequence #2 (5'-3') |
|-----------------------|----------------------------------------------------------------------------------------------------------------------|----------------------------|
|                       | <i>5'-CACCG-Target sequence-3'</i><br>(Complement sequence: <i>5'-AAAC-Reverse complement target sequence-C-3'</i> ) |                            |
| Negative control (NC) | AAATGTGAGATCAGAGTAAT                                                                                                 | -                          |
| POLRMT                | CTAGAGCGCGAGGTGTACGA                                                                                                 | ACAAGCCGAGAGGAACGATG       |
| TEFM                  | ATTATGTAAGGCCAGTACA                                                                                                  | GACCGTTGGAGTTTAATGAG       |
| TFAM                  | TAAACGTTATAAGCTGAACG                                                                                                 | ATATCAAGATGCTTATAGGG       |
| TFB2M                 | TTAAGCGTTACGTAACCGAT                                                                                                 | GTTGGAATGTTCCCAAGTAG       |
| ELAC2                 | TCTGAGACACTACCTTACAG                                                                                                 | ACAGATGAAAGCTACGACCA       |
| PTCD1                 | TTTGCGGAATAGTCTCCGGG                                                                                                 | CTGCAAGAAGTACCAGTACG       |
| PTCD2                 | GTGTTACGAGTTGGATCTCG                                                                                                 | AAGCCGCGGATACCTCCGAG       |
| MRPP1                 | TAAGCCATGTCAAAAACCAA                                                                                                 | CAAGCTGCTAGAAACCACTG       |
| MRPP3                 | TATAAGACTTTAGAACCTAG                                                                                                 | AGCAACGAATCTGATTGCCA       |
| PNPT1                 | GATGTCCTAGCAATTAATGG                                                                                                 | CAAATAAGATTAGATACGG        |
| SUPV3L1               | GGAGCTTATGTACACAACGG                                                                                                 | AGTCGGCAGATTGAAATTCG       |
| REXO2                 | ATAATCAGGTTAGGACCCTG                                                                                                 | TGGGAGTCACGGACGGTTCG       |
| MTPAP                 | TGGTGTGAGAACCTCACGAG                                                                                                 | CTTCTGAACGGTCACGCGTA       |

**Supplementary Table S2.** Primer sequences for RT-qPCR and mtDNA copy number

| <b>Gene</b>                                      | <b>Forward Primer (5'-3')</b>  | <b>Reverse Primer (5'-3')</b> |
|--------------------------------------------------|--------------------------------|-------------------------------|
| ND1                                              | TCAAACCTCAAACCTACGCCCTG        | GTTGTGATAAGGGTGGAGAGG         |
| ND4                                              | CTCACACTCATTCTCAACCCC          | TGTTTGTCTAGGCAGATGG           |
| ND5                                              | CTAGGCCTTCTTACGAGCC            | TTTGGGTTGAGGTGATGATG          |
| CYTB                                             | CAATTATACCCTAGCCAACCCC         | GGATAGTAATAGGGCAAGGACG        |
| CO1                                              | GCCATAACCCAATACCAAACG          | TTGAGGTTGCGGTCTGTTAG          |
| CO2                                              | CTAGTCCTGTATGCCCTTTTCC         | GTAAAGGATGCGTAGGGATGG         |
| CO3                                              | CCTTTTACCACTCCAGCCTAG          | CTCCTGATGCGAGTAATACGG         |
| ISG15                                            | CTCTGAGCATCCTGGTGAGGAA         | AAGGTCAGCCAGAACAGGTCGT        |
| IRF7                                             | CTGTGGACACCTGTGACACC           | TGCCCTCTCAGGAGCCAA            |
| IFI6                                             | TGCTACCTGCTGCTCTTCAC           | CGAGCTCTCCGAGCACTTTT          |
| IFI27                                            | ATCAGCAGTGACCAGTGTGG           | TGGCCACAACCTCCTCCAATC         |
| OASL                                             | GCGGAGCCCATCACGGTCAC           | AGGACCACCGCAGGCCTTGA          |
| <i>tRNA</i> <sup>(Gly)</sup> -<br>ND3            | CCGTAACTTCCAATTAAGT<br>TTG     | TGTAGCCGTTGAGTTGTGGTAG        |
| <i>tRNA</i> <sup>(Asp)</sup> -<br>CO2            | GAAAAACCATTTTCATAACTTTGTC<br>A | GGAAAATGATTATGAGGGCG          |
| <i>tRNA</i> <sup>(Phe)</sup> -<br><i>mt-RNR1</i> | TGTAGCTTACCTCCTCAAAGCA         | AGGGTGAACCTCACTGGAACG         |
| CO2-<br><i>tRNA</i> <sup>(Lys)</sup>             | AGGGCCCGTATTTACCCTAT           | TCACTGTAAAGAGGTGTTGGTTCT      |
| POLRMT                                           | AGCTGCTCAGGGACGTGTAT           | CAGTGCTTTCTCCCATTGGT          |
| TCF21                                            | GAGGCAGATCCTGGCTAACG           | TTTCCCGGCCACCATAAAGG          |
| RASSF1A                                          | ACCTCTGTGGCGACTTCATC           | CGGTAGTGGCAGGTGAACTT          |
| ACTB                                             | CCTGTACGCCAACACAGTGC           | ATACTCCTGCTTGCTGATCC          |

## **Raw blotting and stained SDS-PAGE gel images**

Author notes:

- SDS-PAGE membranes were cut before the hybridization of target proteins' antibodies
- Images were cropped after chemiluminescence detection by ChemiDoc imaging system
- Images for different target protein from the same gel were taken in different exposure to avoid saturation.

Original membrane – Full length blot

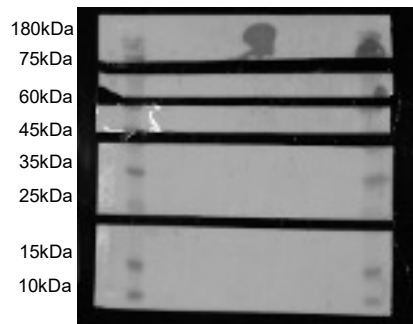

Western blot images

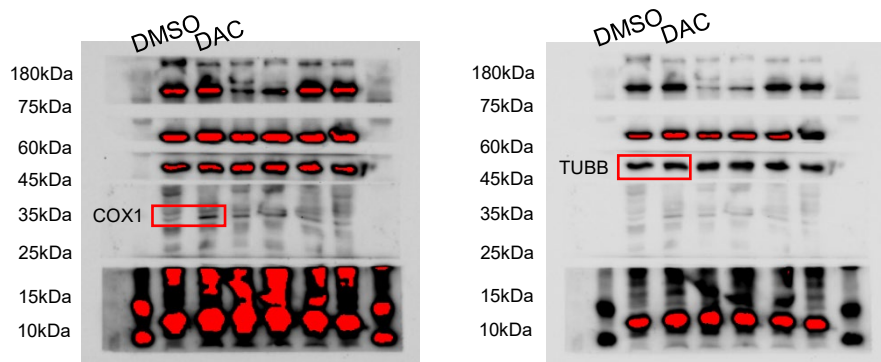

**Supplementary Figure S2. Original blot images for Figure 2D.** In all western blot experiments, membranes were cut prior to hybridizing with primary antibodies. Images were cropped after chemiluminescence detection by ChemiDoc imaging system. The images were taken at different exposure times to avoid saturation.

A. Original membrane – Full length blot for PARP, cleaved PARP and TUBB

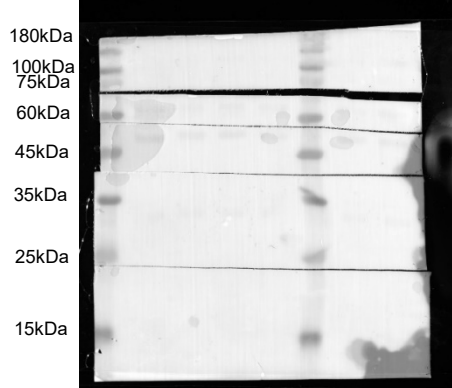

Original membrane for each image

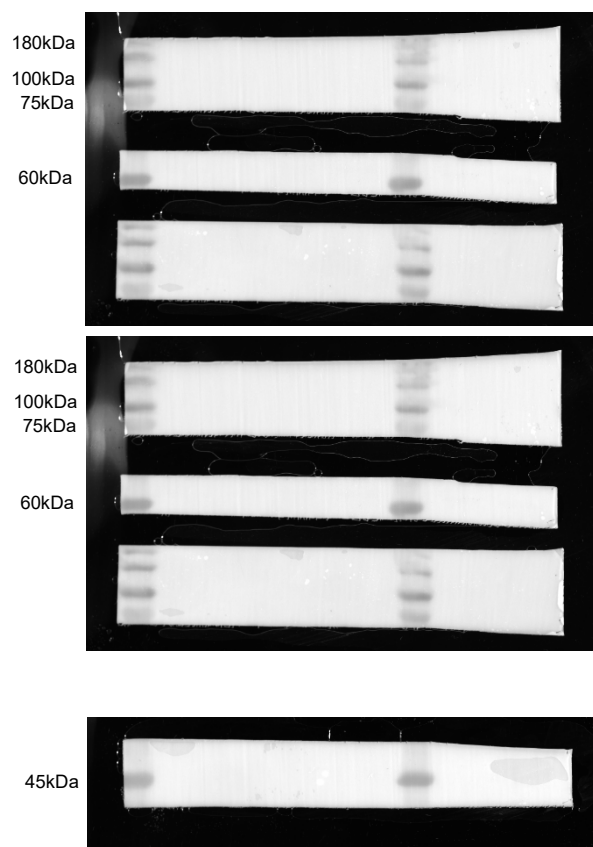

Western blot images

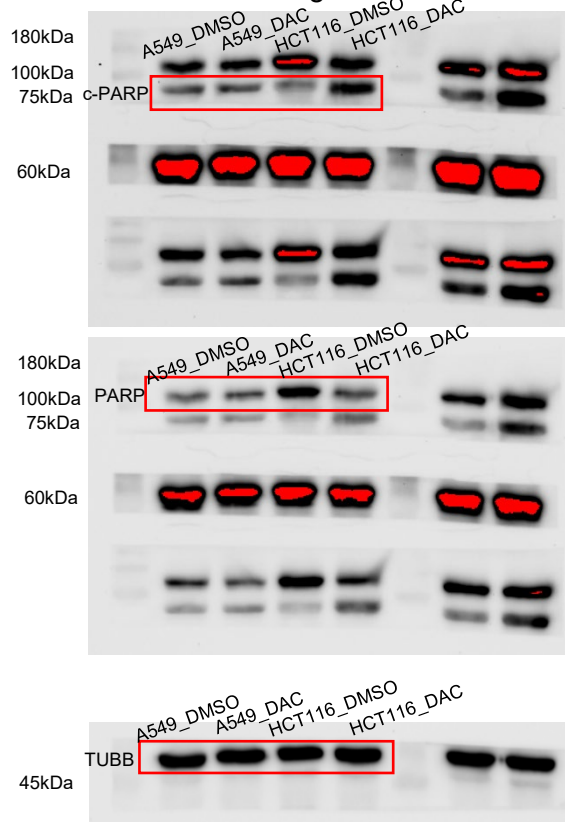

### B. Original membrane for p65

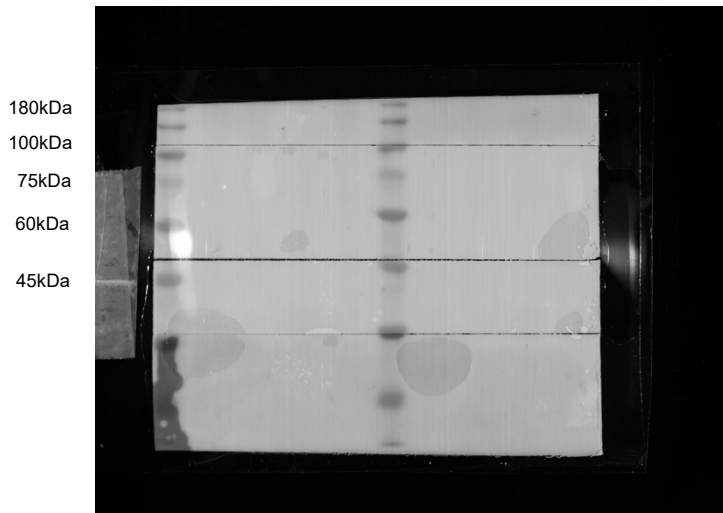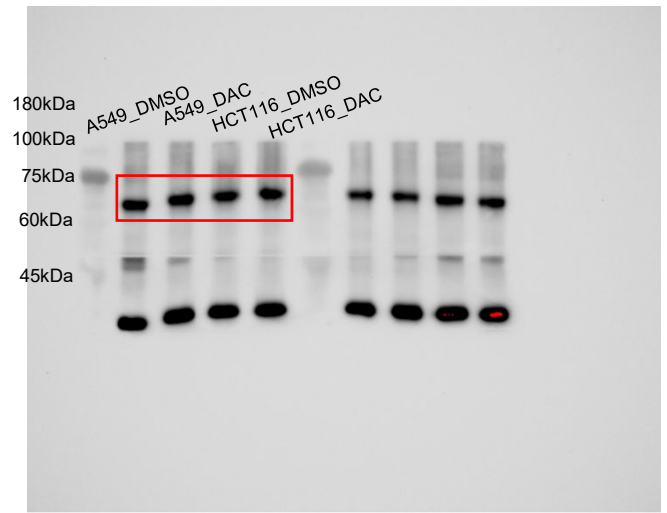

### C. Original membrane for caspase 3 and cleaved caspase 3

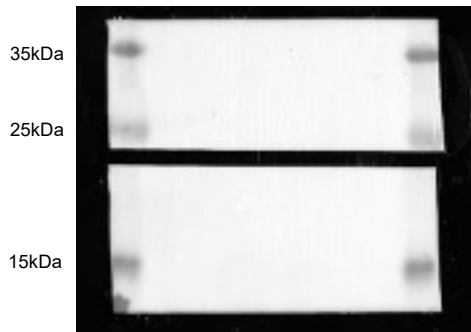

#### Western blot images

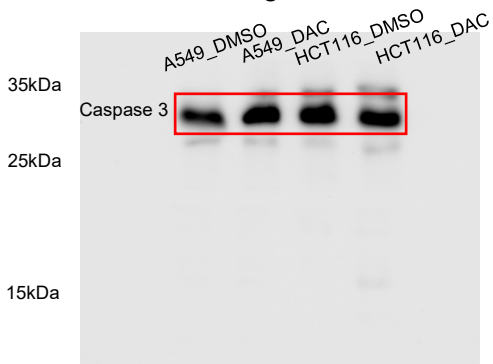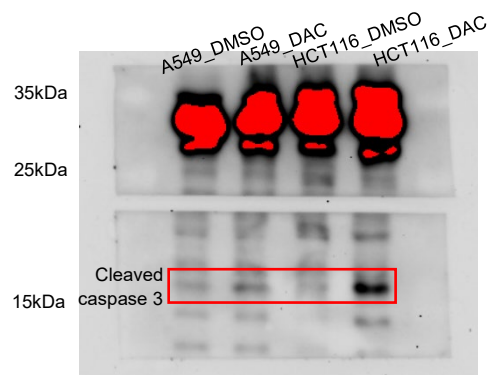



D. Original membrane for p-p65 and BCL-2

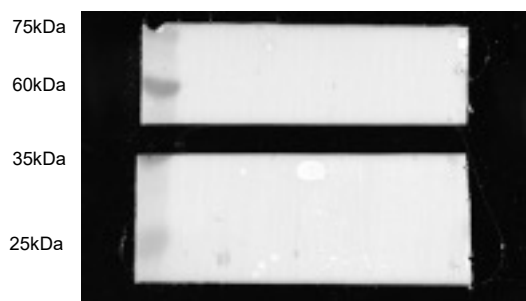

Western blot images

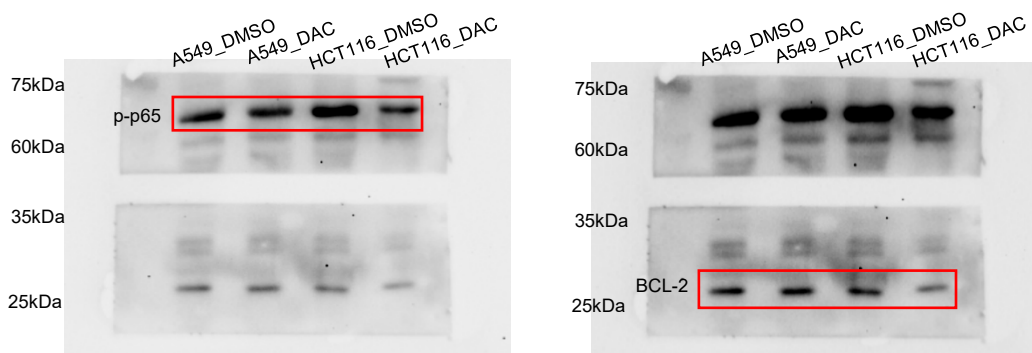

**Supplementary Figure S3. Original blot images for Figure 2H.** All western blots were performed using the same samples but run on different gels due to the similar sizes of the target proteins. This method is performed to provide clear and distinct data presentation. (A) The blots for PARP, cleaved PARP, and TUBB. (B) The blots for p65. (C) The blots for caspase 3 and cleaved caspase 3. (D) The blots for p-p65 and BCL-2. In each subfigure, blots were cropped from the same gel prior to the hybridization of primary antibodies and the images were taken at different exposure times to avoid saturation.

Original membrane – Full length blot

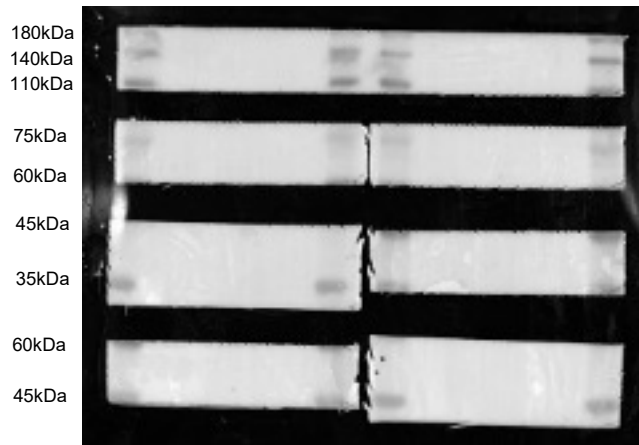

Western blot images

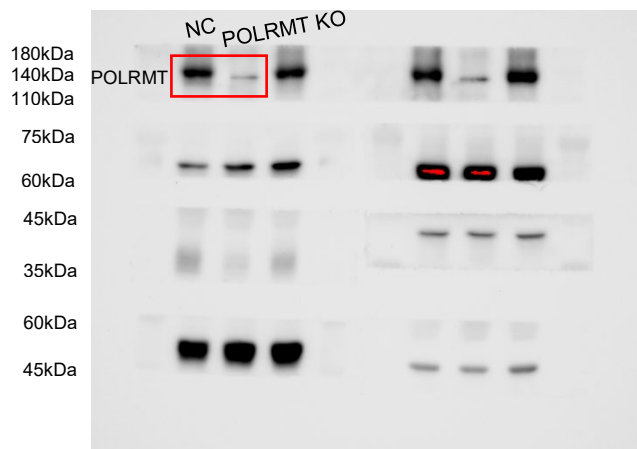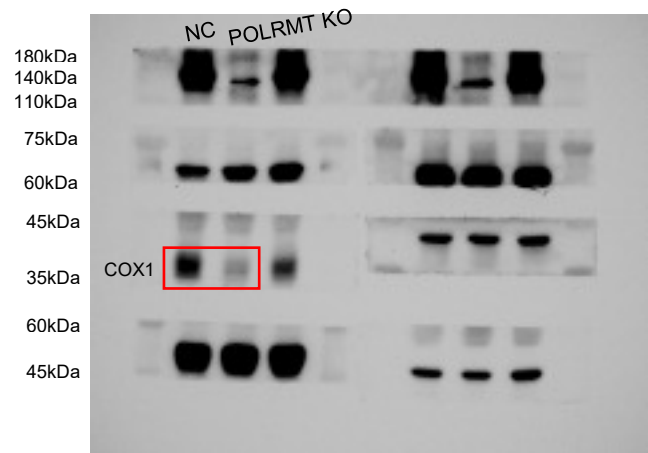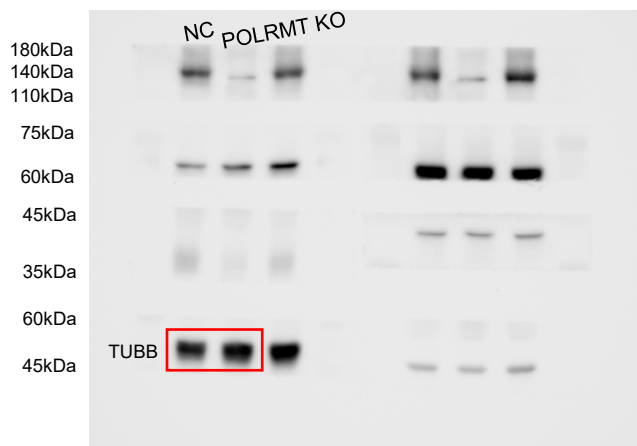

**Supplementary Figure S4. Original blot images for Figure 3C.** The blots were cropped from the same gel prior to the hybridization with primary antibodies and the images were taken at different exposure times to avoid saturation.

Original membrane – Full length blot

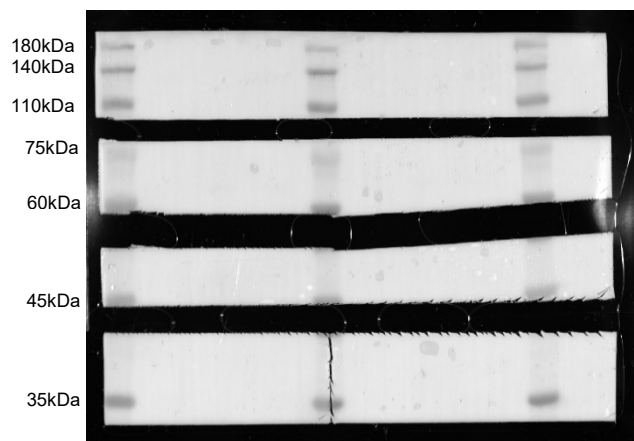

Western blot images

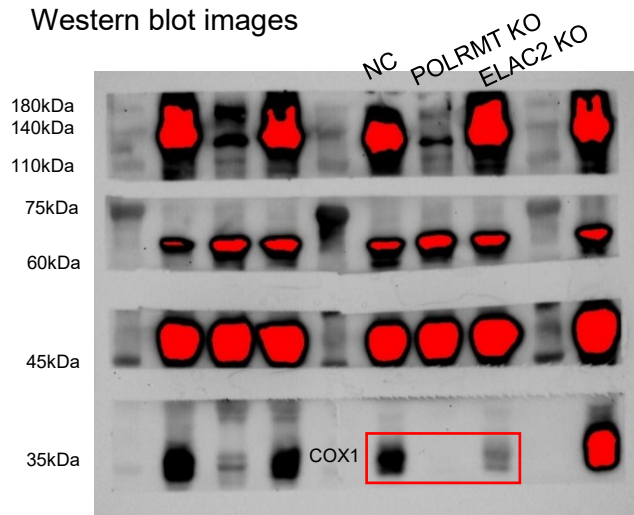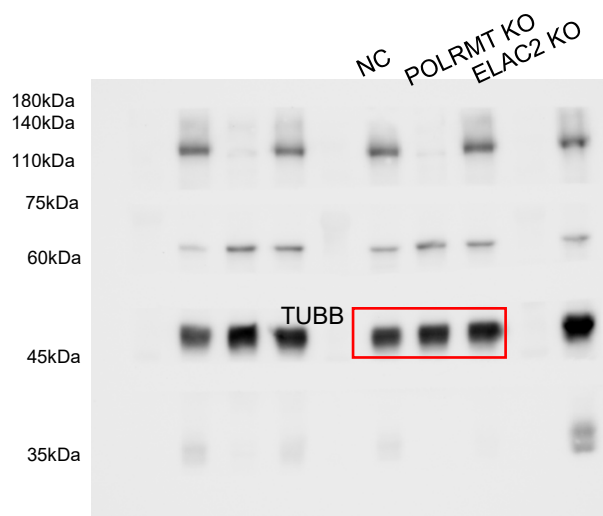

**Supplementary Figure S5. Original blot images for Figure 4C.** The blots were cropped from the same gel prior to the hybridization with primary antibodies and the images were taken at different exposure times to avoid saturation.
